# Supplementary material for: Investigating the cloud radiative effect of Arctic cirrus
Source: Copernicus journal article supplement (doi:10.5194/acp-2022-395), 2022-06-27
Supplement: Supplementary file [file acp-2022-395-AC1-supplement.pdf]

# Response to peer reviews

of the manuscript ACP-2022-395: “Investigating the cloud radiative effect of Arctic cirrus” by Marsing, Meerkötter et al.

*Dear reviewers and dear editor,*

*We thank all reviewers for their careful assessment of the manuscript. The comments raised several important open questions and greatly helped in streamlining the overall analysis, presentation and findings of our study.*

*Below you find part of our authors' answers to the reviews. The reason why this is not complete at this point is twofold: First, as we checked several results of the radiative transfer calculations using the DISORT solver instead of two-stream (used before), we originally did not notice much difference. However, in the last few days, we found that deviations are stronger and more prevalent than thought, leading us to redo all RT calculations. We would like to be consistent and careful here. This has been taking some time, especially to transfer the results to all figures and to adapt all text and answers. Second, just now we stepped into some technical issues due to maintenance work on our institute network, which renders access to all necessary files quite difficult.*

*Therefore, we would like to hand in the completed answers and the revised manuscript in the course of the next week. We hope and ask for your generous understanding to the delay. This has also been announced beforehand to the editor.*

*Yours sincerely,*

*Andreas Marsing, on behalf of all authors*

*The reviews are written in black. The authors' response to the reviews is given below each paragraph in blue italic font.*

## Review by anonymous reviewer #1

The authors are to be congratulated on showing the thin ice cloud radiative effects over the polar region using two profiles obtained from aircraft measurements during the Polar Stratosphere in a Changing Climate (POLSTRACC) campaign. I enjoyed reading this manuscript, particularly the instrumentation and data processing section which I am unfamiliar with. Obviously, only two ice water content (IWC) profiles cannot fully describe the cloud variability over the Arctic. However, by making use of the two profiles, the authors study the sensitivities of cloud radiative effects to solar zenith angle and surface albedo variations. The authors also study the difference in computed cloud radiative effects between using IWC aircraft measurement and optically equivalent constant IWC. How the aircraft measurement data are used to prepare the ice cloud description for the radiation computations is nicely presented in detail. All the assumptions made in the radiation computations are clearly stated. The only problem I have is that the computed longwave irradiance variation within the cloud layer looks strange to me and appears to contrast with the results in numerous previous studies. Hence, I would like to suggest the authors double check the longwave radiation computations in this study. Beyond this problem, this manuscript is clear, organized, and well-written and I would suggest it be accepted for publication after some revisions if needed.

*We thank the reviewer for his/her kind words and the positive assessment of the manuscript. The concern regarding our longwave irradiance profiles is addressed in the respective paragraph below.*

My specific comments are as follows:

**Major comments:**

Lines 171-173. Is the air in the (polar) stratosphere generally descending? What is the situation in the troposphere, particularly the upper troposphere that is of interest in this study? Is the air in the troposphere also generally descending? If the upper tropospheric air was also descending during the two months of interest, why do you think the mass accumulation near the tropopause during the two months was a result of the descending motion in the stratosphere? If the steady descending motion in the stratosphere exists and persists, will the static stability of the tropopause become increasingly higher as time goes by?

*In a zonal and multi-annual mean, there is a generally descending motion in the winter and spring polar stratosphere, which has also been observed, e.g. in terms of N<sub>2</sub>O, in the winter 2015/2016 (Manney and Lawrence, 2016; Birner, 2010). In contrast, tropospheric eddies counteract descending motion (Birner, 2010), which also stabilize the height of the tropopause. Birner also points out how these opposing effects lead to the increasing static stability above the tropopause. We include these references in the manuscript.*

Figure 12. Numerous studies have shown that cloud longwave radiative heating/cooling rate have a vertical gradient from cloud base to cloud top, i.e., heating at the cloud base and cooling at the cloud top (e.g., Fu et al., 1997; Ren et al., 2020, 2021; Wall et al., 2020). However, the red curves in Fig. 12(a) and 12(d) show the opposite, i.e., longwave radiative cooling at the cloud base and heating at the cloud top. I used the longwave version of the rapid radiative transfer model (RRTM; Iacono et al., 2000) with scattering included (Tang et al., 2018) to do a quick check. The resultant longwave irradiance ( $I_{LW}$ ) and radiative heating/cooling rate ( $H_{LW}$ ) profiles are shown in the figure below:

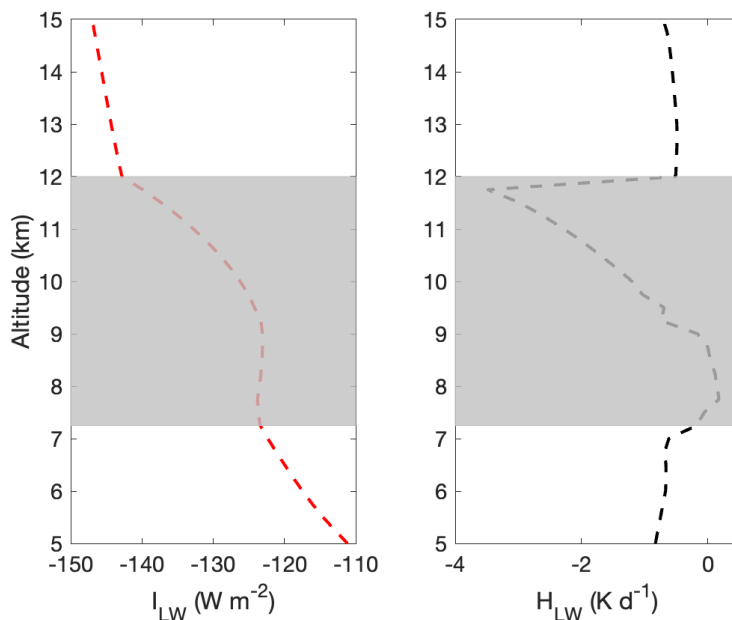

Figure C1 Longwave irradiance ( $I_{LW}$ ) and radiative heating/cooling rate ( $H_{LW}$ ) profiles in an RRTM experiment.

In this RRTM experiment, a homogeneous ice cloud layer with constant IWC of  $0.0032 \text{ g m}^{-3}$  is placed between 7.25 and 12 km; a constant effective radius of  $23 \mu\text{m}$  is assumed; a subarctic winter atmospheric profile is adopted with surface temperature set to 280 K and surface emissivity set to 1. Such settings in the RRTM experiment resemble the case of January 25, 2016 in this study. As shown in the above figure, the decrease of  $I_{LW}$  with height is slower in the lower portion of the cloud layer, whereas in Fig. 12(a) and 12(d) the decrease of  $I_{LW}$  with height is slower in the upper portion of the

cloud layer. Would it be helpful to double check your longwave radiation computations? What radiative transfer solver in libRadtran did you use for the longwave radiation computations? Will the ILW result change if you switch to using another solver, such as DISORT?

*We thank the reviewer for the careful investigation of the LW irradiance profile. We suppose that the difference in the radiative transfer calculations results from the used atmospheric temperature profiles. In our original calculations, we tried to resemble the situation at the time of cirrus sampling as closely as possible by using temperature profiles from the ECMWF IFS model (as explained in the manuscript). In Figure A2 in this answer, we show on the left panel how the profile from the 25 January case (black) differs from the **standard** subarctic winter profile (light blue) or from other synthetic profiles. The right panel gives the corresponding LW irradiance profiles. We observe that our  $I_{LW}$  profile in the subarctic case closely resembles that from reviewer #1. We deduce that especially the strong inversion at the tropopause, which is only present in the “real” profile, causes the deviation in the irradiance profile, which naturally propagates into the heating rate profile. **To be added: Sentence on RT solver.***

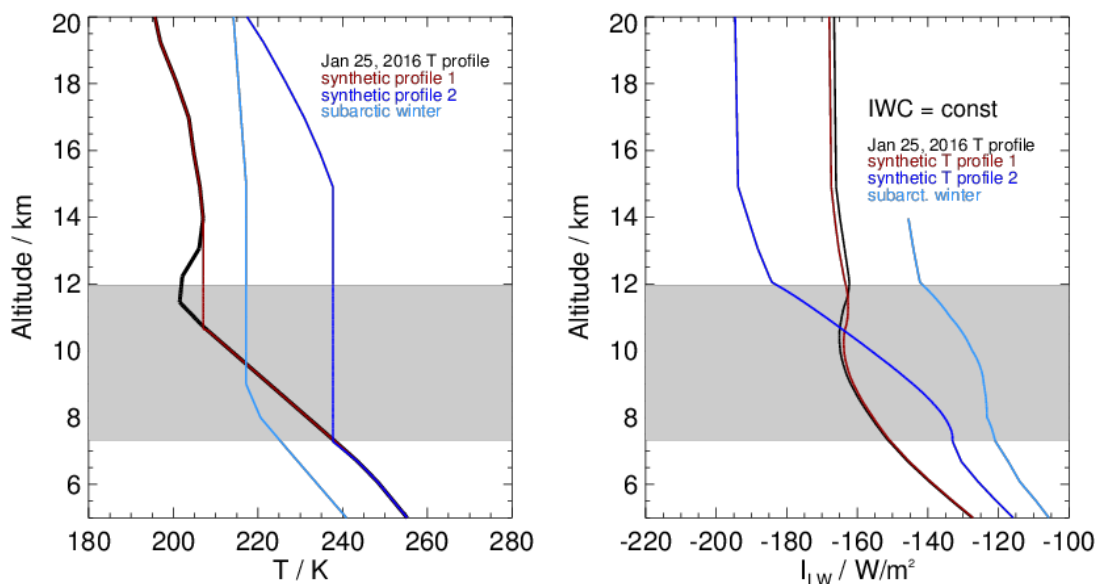

Figure A2 Left: temperature profiles, i.e. original POLSTACC profile (black) plus further synthetic profiles (red, dark blue) as well as the profile of the subarctic winter standard atmosphere (light blue). Right: corresponding LW irradiance profiles. Curves explain that the pronounced temperature inversion in the POLSTRACC profile produces the significant difference to the irradiance profile calculated by referee #1.

## References

- Fu, Q., Liou, K., Cribb, M., Charlock, T., & Grossman, A. (1997). Multiple scattering parameterization in thermal infrared radiative transfer. *Journal of the Atmospheric Sciences*, 54(24), 2799-2812. [https://doi.org/10.1175/1520-0469\(1997\)0542.0.CO;2](https://doi.org/10.1175/1520-0469(1997)0542.0.CO;2)
- Iacono, M. J., Mlawer, E. J., Clough, S. A., & Morcrette, J. J. (2000). Impact of an improved longwave radiation model, RRTM, on the energy budget and thermodynamic properties of the NCAR community climate model, CCM3. *Journal of Geophysical Research: Atmospheres*, 105(D11), 14873-14890. <https://doi.org/10.1029/2000JD900091>

Ren, T., Li, D., Muller, J., & Yang, P. (2021). Sensitivity of radiative flux simulations to ice cloud parameterization over the equatorial western Pacific Ocean region. *Journal of the Atmospheric Sciences*, 78(8), 2549-2571. <https://doi.org/10.1175/JAS-D-21-0017.1>

Ren, T., Yang, P., Schumacher, C., Huang, X., & Lin, W. (2020). Impact of cloud longwave scattering on radiative fluxes associated with the Madden-Julian Oscillation in the Indian Ocean and Maritime Continent. *Journal of Geophysical Research: Atmospheres*, 125(13), e2020JD032591. <https://doi.org/10.1029/2020JD032591>

Tang, G., Yang, P., Kattawar, G. W., Huang, X., Mlawer, E. J., Baum, B. A., & King, M. D. (2018). Improvement of the simulation of cloud longwave scattering in broadband radiative transfer models. *Journal of the Atmospheric Sciences*, 75(7), 2217–2233. <https://doi.org/10.1175/JAS-D-18-0014.1>

Wall, C. J., Norris, J. R., Gasparini, B., Smith Jr, W. L., Thieman, M. M., & Sourdeval, O. (2020). Observational evidence that radiative heating modifies the life cycle of tropical anvil clouds. *Journal of Climate*, 33(20), 8621-8640. <https://doi.org/10.1175/JCLI-D-20-0204.1>

#### **Minor comments:**

Line 29. “trough” or “through”?

*“Through” is probably bad expression. We change it to “from”.*

Line 80. It looks “CIRRUS-HL” is a contraction, but it is not spelled out when it first appears in this article here.

*We set a parenthesis to better express that CIRRUS-HL stands for cirrus in high latitudes. However, the occurrence of this acronym is now moved to the end of the manuscript.*

Lines 102-104. Is water vapor mixing ratio much higher than the saturation mixing ratio in a homogenous ice nucleation environment? I notice that as shown in Fig. 3 the POLSTRACC cirrus measurements were taken at temperatures between 195 and 250 K. Do you know if there are previous studies of the importance of homogenous vs. heterogenous ice nucleation in the polar atmosphere with this temperature range?

*The homogeneous freezing threshold in the relevant temperature range varies between about 150 – 165 % in terms of relative humidity with respect to ice ( $RH_{ice}$ ) (e.g. Krämer et al., 2016), so there can indeed be considerable super-saturation in a homogeneous nucleation scenario. The prevalence of homogeneous or heterogeneous ice nucleation depends primarily on the updraft speed of the humid air mass (Krämer et al., 2020) associated with the meteorological situation. In polar regions, this includes primarily low and high pressure systems and warm conveyor belts (slow updrafts) and gravity waves and jet streams (fast updrafts). Without further analysis of the flow conditions and history, this may adversely affect the accuracy of the IWC values, which is what we suppose to be the reviewer’s main concern. We provide resolutions to this in the specific answers to reviewers #3 and #4.*

Line 118. It looks “FISH” is a contraction, but it is not spelled out when it first appears in this article here.

*We include the full name “Fast In-situ Stratospheric Hygrometer” in the text.*

Line 174. Does the “latter” refer to “dynamical tropopause”? Why is the dynamical tropopause a transport barrier of air masses?

*In many cases the dynamical tropopause is a transport barrier, but not necessarily in convection or when radiative heating or cooling takes place as it is the case inside clouds. To avoid confusion, we omit the half sentence “With the latter acting as a transport barrier of air masses”.*

Lines 175-176. You mean the observed cirrus clouds above the dynamical tropopause will eventually become polar stratospheric clouds (PSCs)? How are PSCs defined? What are the criteria used to judge whether a cloud is a PSC?

*We rephrase this sentence, as it might be confusing. There are several PSC types, and some consist of water ice or contain a high fraction of water ice. In that sense, it is safe to say that ice clouds above the polar tropopause reflect a lower branch of PSCs.*

Lines 180-182. Is the thermal tropopause the local temperature minimum? However, as shown in Fig. 4, what the authors refer to as “stratospheric cirrus” show the lowest temperatures, making me wonder if these “stratospheric cirrus” clouds are also below the thermal tropopause?

*We clarify upon this by explicitly referring to the WMO tropopause. Accordingly, the thermal tropopause or lapse rate tropopause is the lowest level at which the lapse rate falls below  $2 \text{ K km}^{-1}$  (with some additional constraints). Therefore, the thermal tropopause is (sometimes considerably) lower (in altitude) than the local temperature minimum.*

Lines 298-299. The agreement between aircraft and reanalysis water vapor data surprises me. This result suggests that the quality of ECMWF IFS analysis water vapor data is very good, at least over Northern Europe.

*We clarify on this a little bit more in the text, mentioning that we compare only exemplary sections of data near our cloud profiles of interest (not within, as we have no humidity data there). Indeed we find exceptional agreement there, but we cannot generalize this observation to a broader domain.*

Lines 355-357. These two sentences read awkward to me. Correct me if I am wrong, basically you wanted to say increased optical thicknesses of ice clouds increase the cloud LW effect (forcing), i.e., making more surface emitted LW radiation absorbed by ice clouds and hence  $F_{\text{net,TOA,LW}}$  less negative?

*To be added*

Lines 362-363. I cannot understand this sentence “a transition that is shifted towards larger  $s_{\text{za}}$  when compared to the curves in Figs. 8a, b”. Line 419. “shadowing effects”? What do you mean by “shadowing effects”? Didn’t you set the cloud fraction to 1 in each cloud layer in your radiation computations? In other words, every cloud layer is overcast in your computations, isn’t it? If so, cloud overlapping does not matter in your computations.

*To be added*

Lines 421-422. Does this sentence talk about the case on March 9, 2016?

*To be added*

## Review by anonymous reviewer #2

### General comments

This is an interesting study. However, I would think it requires major revisions before it can be considered for publication in ACP. In this paper, IWC profiles of two specific cases are used to investigate the sensitivity of cirrus radiative effects on different parameters using radiative transfer

simulations. The resulting dependence of the radiative effects of the cirrus on solar zenith angle and surface albedo is not particularly exciting, this is almost common knowledge. What I found original is the comparison of simulations assuming homogeneous clouds vs. using IWC profiles measured with high vertical resolution. I would consider this the most interesting part of the paper. Therefore, the study could become even more relevant, when additional artificial profiles would be considered. The paper already shows, that measured profiles result in different radiative effects compared to homogeneous cirrus. However, the question is how representative the few measured profiles are. How would the results change if IWC increases/decreases with altitude? This could lead to some more general conclusions of the paper.

*We thank the reviewer for his/her thorough assessment of the manuscript and for the helpful comments. Taking all the reviewers' suggestions into account, we decided to follow reviewer #2<sup>nd</sup>'s suggestion in part to expand the radiative effect study by a few more artificial profiles. The added "storyline" shows how the transition from simple to ever more realistic IWC profiles translates into the radiative effects at TOA, BOA, in-cloud. To be completed*

### Specific comments

#### 1. Introduction

- The title should already indicate, that this is a case study. Otherwise the reader expects more than the paper can deliver.  
*This is something that had also gone through our minds. We agreed and change the title: The cloud radiative effect of Arctic cirrus measured in situ during the POLSTRACC campaign*
- The introduction mixes state of the art with data description and even already conclusions from this study. This is confusing and should be clearly separated.  
*To be added.*
- Line 15: No numbers are given to quantify the importance of the cirrus radiative effect. Switching from negative to positive is important, but not, if we switch between  $\pm 0.01 \text{ W m}^{-2}$   
*This is part of the abstract and we need to provide a number here as soon as the final numbers are available.*
- Line 32: What means "unavoidable"?  
*We remove the possibly confusing adjectives.*
- Line 63: Flight hours depend on flight speed and do not reflect the amount and representativeness of the data. Also different instruments sample different volumes during the same time. Horizontal distance, sampled volume, total particle number would be more meaningful.  
*As suggested, we provide a distance, whereas meaningful values on sampled volume and particle number cannot be given. Still, flight hours are a common and interesting measure in the community to get an idea of the extent of a field campaign.*
- Line 68: What means "thin"? IWP or optical thickness measurements should be quoted here. Or you characterize the general cirrus conditions during the campaign earlier.  
*We agree that the handwavy "thin" characterization is not adequate here. We elaborate on IWP and optical thickness later.*
- Line 73: This is an example of mixing conclusions into the Introduction. This was not shown yet. Needs to be demonstrated.  
*We rephrase the sentence and move the finding to the conclusions. This should better express what we wanted to say, the intersection with and difference to the Feofilov study.*

- Lines 79-80: should be part of the conclusion section.  
*We move this to the conclusions.*
2. In situ measurements of IWC
- Line 86: How do you measure IWC? The first two paragraphs read as if WARAN is measuring water vapor only. First introduce the concept, which allows also to derive IWP from the instrument (heating, evaporation, etc)  
*We adapt the storyline to begin with measured total water content (TWC).*
  - Line 103: This means, that you assume saturated air within the cirrus. Provide a justification, that this assumption is valid in most of the cases.  
*We acknowledge the lack of a justification why we pursue our study with such a simple assumption. We are well aware that (near) saturation is by far not the only scenario of relative humidity inside cirrus. Therefore, we change the text to explicitly quote this knowledge and explain why the impact on IWC values is less severe than one might think. The reason is the enhancement of ice particles in the sample flow.*
  - Line 110: What is the inlet velocity and how large is it? Is this measured in parallel or is this combining all the enhancement effects?  
*We give a number for the inlet velocity, which is very precisely known using the hygrometer's cell pressure and either a mass flow controller or a critical orifice with known characteristics. However, we assume that explanation of this detail is of lesser interest for the manuscript.*
  - Line 118: Why can FISH serve as a reference? Is it more precise? Why not using FISH data for this study?  
*FISH is not a reference, but another instrument that can provide IWC in a similar way. As an earlier comparison of both measurements showed a systematic bias employing data from an earlier campaign (Afchine et al., 2018), we repeat the comparison which now shows substantially better agreement. This gives confidence to the accuracy of both instruments, but especially to WARAN. The precision in the studied range of TWC values is comparable, so there is no reason in this respect as to whether one instrument should be preferred over the other.*
3. Statistics from Arctic cirrus sampling
- Fig. 3: Add the legend from the original publication.  
*We add the original legend.*
  - Line 142 ff: Are measurements in mid-latitudes included in this "Arctic" study? Below in the text it is separated. But I suggest to remove all mid-latitude data from the beginning. The study aims for Arctic cirrus. So there is no need to discuss mid-latitude cirrus in this paper.  
*We would like to keep the overview of mid-latitude cirrus as this dataset has not been shown elsewhere. Also, many important climatological studies of cirrus make a lesser separation along latitudes. As this study is founded in part on this common knowledge, and to give context to the measurements and why they are as they are, we would like to keep them in at this point.*
  - Extending Fig. 3 might also not be the main objective of this study. Consider to focus on the Arctic cirrus.  
*One of the objectives of the POLSTRACC campaign was to extend the in situ data on cirrus in this temperature/latitude parameter space. Therefore, we find it worthwhile to show what could be achieved in this respect, and to give an updated idea of available data.*
  - Line 162: The analysis of Fig. 4 should be better motivated with respect to the main objective of the paper. e.g.: temperature might affect emission - thermal IR radiative effect.

*We agree and rephrase the motivational sentence. In that, we clarify what might be relevant macrophysical properties of cirrus near the tropopause.*

- Line 166: Explain PVU, please.  
*We give the definition of the potential vorticity unit (PVU).*

#### 4. Complete profiles of cirrus at the high latitude tropopause

- Line 204: These very thin cirrus clouds are common for the Arctic: Really? Only 4 profiles are from Arctic locations.  
*This sentence was misleading. It is rephrased to express that thin cirrus are common for the Arctic (as stated in the literature). The optical thickness of the profiles at hand is assessed elsewhere.*
- Table 1: Leave out the mid-latitude cirrus, give IWC in  $\text{g m}^{-3}$   
*We would like to keep the mid-latitude profiles in until here, as motivated above. We give the IWC additionally in  $\text{mg m}^{-3}$ . Both representations (molar mixing ratio and mass concentration) have their justifications.*
- Line 210: What do 18 min mean in distance?  
*We give the value which is about 230 km.*

#### 5. Radiative transfer calculations

- First paragraph: Partly a repetition of the introduction. As a reader, I expect a focused and detailed description of what has been done in this section and not another general overview.  
*To be added.*
- Line 253: The radiative transfer solver is not given in this section. DISORT or two-stream? For SW: UV radiation is neglected? How large is the contribution of UV, which is not covered by the simulations?  
*To be added.*
- Line 258: More details on this parametrization are needed. What does  $R_{\text{eff}}$  depend on? Is the Liou parametrization consistent with the parameterization of optical properties by Baum et al?  
*To be added.*
- Lines 261-262: Even if there are no in situ measurements of crystal shapes available for the cases investigated here, shape effects should at least be discussed. You may refer to the following two papers that would fit here:  
*To be added.*
  - For the thermal-infrared: Wendisch, M., P. Yang, and P. Pilewskie, 2007: Effects of ice crystal habit on thermal infrared radiative properties and forcing of cirrus. *J. Geophys. Res.*, 112, D08201, doi:10.1029/2006JD007899
  - For the solar: Wendisch, M., P. Pilewskie, J. Pommier, S. Howard, P. Yang, A. J. Heymsfield, C. G. Schmitt, D. Baumgardner, and B. Mayer, 2005: Impact of cirrus crystal shape on solar spectral irradiance: A case study for subtropical cirrus. *J. Geophys. Res.*, 110, D03202, doi:10.1029/2004JD005294.
- Line 276: It seems, that broadband albedo data of fixed values are used. In that case, I don't understand, why not simply changing surface albedo in 0.1 steps between 0 and 0.9? Such simulations can be attributed to specific surface types afterwards.  
*To be added.*
- Line 281: Snow and ocean do not reach an emissivity of 1.0. There is no need to make this approximation.  
*To be added.*



- Line 286: It is not clear, what temperature and humidity data are finally used for the simulations. HALO, IFS or GEMS? Or did you merge the data?  
*We rephrase some sentences to make clear that we use model (IFS and GEMS) data for everything except from IWC.*
- Line 300: Are the measurements only used to validate the model or are they merged with the model for the final input of the UVSPEC?  
*We use measurements (apart from IWC) only in order to validate the model.*
- Eq. 4: I always thought that net irradiance is the difference between downward and upward irradiance. I understand that you define upward to be negative, this seems odd, at least from a measurement point of view (negative irradiances?).  
*To be added.*
- Line 315: Using symbol "I" for irradiance is uncommon. Now you use "F" as a second symbol for the same quantify. Net irradiance has the same unit as the irradiance. I recommend to use only one symbol.  
*We thank the reviewer for discovering this inconsistency. We now write "F" everywhere for (net) irradiance.*
- Line 333: What is the motivation to use different surface albedo for the second case? Hard to compare the impact of IWP of the two clouds, when the albedo is different.  
*To be added.*
- Line 353: Both cirrus have almost the same optical thickness. What is the gain to analyze a second case with similar optical thickness? What was different between both days? Should be motivated when introducing the cases.  
*To be added.*
- Line 369: To me the conclusion looks different: There is simply no significant solar radiative effect by the cirrus, if the surface albedo is high. Thus, no SZA dependence is visible.  
*To be added.*
- Fig. 11 very similar to Fig. 6, please combine them.  
*To be added.*
- Line 392: similar discussion for Fig. 6.  
*To be added.*
- Line 393: Temperature profile is not discussed. But this might have an impact on LW radiation.  
*To be added.*
- Line 438: 4.47 K day<sup>-1</sup>: What is the layer thickness the heating rates are related to? The absolute values strongly depend on this. Without knowing the thickness, the values are not comparable to other studies.  
*To be added.*
- Fig. 12: The heating rate profiles do not seem to fit to the net irradiance profiles. Decrease of net irradiance should always result in a negative heating rate. Or is this only the cloud contribution to the heating rate?  
*To be added.*
- Line 446: This should be discussed with the differences between solar and IR wavelength. The heating rates likely are dominated by the IR irradiances. There is no chance, that the surface albedo makes a big difference.  
*To be added.*
- Line 449: If Fig. A3 is discussed here in the main part of the paper, then the figure should also be placed within the main text. Readers should not be forced to move forward to

the appendix while reading.

*The figure is moved to the main text.*

#### 6. Discussion and outlook

- Why no conclusions?

*The section title is misleading. Of course we have conclusions. We rename the section to “Discussion and conclusions” and give an outlook separately afterwards.*

- Discuss, if the measurement strategy/flight pattern affects the conclusions given here. The IWC profiles are not measured at a single location and might be affected by horizontal inhomogeneity of the cirrus. This should be mentioned and discussed here.

*Good point, wilco. To be added.*

- The effect of the temperature profiles and the location of the cirrus with the profile was not discussed. As the longwave heating is dominating over the solar effect, this is more important than changing surface albedo.

*To be added.*

#### 7. Appendix

- As mentioned above: I would prefer to have the plots in the main text, where they are obviously needed.

*All plots now appear in the main text. We decided to leave the last table in the appendix, though.*

## Review by anonymous reviewer #3

This paper uses the measurements of a hygrometer (WARAN) to infer the water contents of cirrus clouds and then based on the inferred cloud water content to quantify the radiative effects of the cirrus in the arctic region. As the authors correctly state, cirrus clouds are frequent in the arctic and potentially play an important role in influencing the radiative balance in the region. However, it is difficult to ascertain their radiative effect because the effect depends not only on the cloud properties, which are difficult to measure, but sensitively on various environment variables such as solar zenith angle and surface albedo which can affect both the magnitude and sign of the radiative effect. I am convinced the topic and objective of this work are both important and think works like this one that base on data to assess the radiative effect of cirrus clouds in the arctic are much needed and should be encouraged. I also find the paper generally well written, providing a clear documentation of the research steps and results.

Although the research is well motivated, I found several critical issues with this work. These include the quantification of the ice water content and the configuration of the environmental profiles for the radiative assessment. These deficiencies limit the usefulness of this work and should be addressed before the paper is considered for publication.

*We thank the reviewer for his/her encouraging words and for the overall positive assessment of the manuscript. The important point regarding the IWC measurements was raised by all reviewers. We acknowledge that this aspect was not well represented in the original manuscript. Concerning the radiative assessment, and taking into account the other reviewers' comments, we decided to expand the study a bit and tried to make it more relevant to the community, as the reviewer understandably demanded. We elaborate on this in the specific answer below.*

### IWC

Given that IWC is not directly measured but inferred in the total water measurements. The accuracy of the data are especially in need of validation. I found it unsatisfactory to only present a PDF summary (fig 1) of the WARAN vs FISH comparison, without explaining the different behaviour

documented here compared to the literature (overestimation of WARAN) or analyzing the biases pattern, e.g., under moist vs. dry conditions, at different times of the day (solar angles), association with underlying surface types (albedo), and collocated dynamical fields.

*We rephrase parts of the IWC measurement section in order to make the measurement process and derivation of IWC more traceable.*

*The instrumental paper by Afchine et al. (2018) comprehensively studies the capabilities, limitations, uncertainties and deviations of the used hygrometers and inlet configuration. We go no further than that. Having said that, we were actually quite surprised that the inter-instrumental comparison between FISH and WARAN could still be notably improved compared to Afchine et al. (2018), by means of some basic improvements in calibration and data treatment. This does not reduce the inherent deficiencies, but justifies the use of the relatively simple WARAN instrument for this study.*

Moreover, it seems the authors completely ignored the possibility of ice supersaturation in inferring the ice content from the total water measurement. Given how common the UTLS air is found to be in a supersaturated state and how the ice and supersaturated air are intrinsically related in influencing the radiation fields (e.g., Tan et al. 2016, <https://doi.org/10.1002/2016GL071144>), this is not acceptable. It is understood that independent data not available from the campaign, but at minimum this issue should be recognized and discussed, preferably using the statistics of the supersaturation or its relation to environment conditions obtained from other campaigns. In this regard, it appears especially hand-wavy, and possibly wrong, to inflate the IWC by 5 times in the radiative assessment.

*We acknowledge the lack of a justification why we pursue our study with such a simple assumption. We are well aware that (near) saturation is by far not the only scenario of relative humidity inside cirrus. Therefore, we change the text to explicitly quote this knowledge and explain why the impact on IWC values is less severe than one might think. The reason is the enhancement of ice particles in the sample flow. Therefore, we also effectively avoid to mistake supersaturation as ice crystals.*

## **Radiative assessment**

*To be added.*

The authors correctly recognize that the radiative assessment is sensitive to the environment conditions coexisting with the cirrus, such as the solar angle and surface albedo. However, it doesn't appear logic to me that they extensively use idealized (nominal) values of these parameters rather than best estimates of them from appropriate datasets. Generally speaking, we don't need another set of sensitivity experiments to illustrate how complex the cirrus radiative effects are but are in great need of measurement data to nail down what exact effects are in the nature. The authors need to either provide convincing arguments as to how the sensitivity computations done here are new or useful (how it can be related to nature), or change their strategy and properly pair their cirrus data with the values of those parameters appropriate to the time and location in their assessment.

Also, these aspects of the assessment probably can be better documented or explained:

The configuration of the RT model, e.g., how many streams are used in the RT solver, how the scattering angles are discretized, ... these aspects all affect the results. The sensitivity of cirrus effect to the solar zenith angle is not well explained in the current paper; unclear how the scattering angle effect (forward scattering) and light path effect respectively affect the result and which dominates.

Possibility of sub-cirrus cloud layers, which are often found in nature and are expected to strongly affect the assessment of the radiative impacts of cirrus.

Optical depth of the aerosol (haze) layer prescribed – how much does it affect the lower boundary reflectance, and how are the cirrus effect depends on this factor.

## Review by anonymous reviewer #4

### General Comments:

The cloud radiative effect (CRE) of cirrus clouds tends to be strongest in the Polar Regions since cirrus cloud emissivity tends to be greater than the corresponding albedo, and longwave (LW) radiation tends to dominate over shortwave (SW) radiation in the Polar Regions. This gives Arctic cirrus a potentially elevated status in terms of radiative impact on climate. Moreover, cirrus clouds having visual optical depths  $\tau_{\text{vis}}$  between 0.3 and 3.0 have the greatest frequency of occurrence (Hong and Liu, 2015, JCLim), have a CRE representative of cirrus clouds overall (Hong and Liu, 2016, JCLim), and appear to be most abundant in the Arctic during winter (DJF; Mitchell et al., 2018). Thus, the CRE of winter Arctic cirrus might be particularly strong, making the topic of this journal submission of interest.

However, this manuscript was written with a focus on SW radiation with LW radiation arguably secondary in importance. While the SW radiation is more interesting in many respects, the uniqueness of Arctic cirrus in terms of LW radiation should not be ignored. In the results section, it might be instructive to show net irradiance for these surface albedo (and cloudy vs. clear) conditions as a function of time over a 24 hour period. Relating TOA Fnet (same as CRE) to solar zenith angle is fine but this focus might detract from the fact that most of the time during Arctic winter the sun is not present and Fnet is determined only by LW radiation. A representative latitude (based on in situ sampling) could be selected for this. This would add perspective for those readers seeking a more representative understanding of Arctic cirrus radiative effects.

The paper is well written and organized and presents results that appear to be unique. After some minor revisions, it should be appropriate for publication in ACP.

*We thank the reviewer for his/her positive assessment of the manuscript and for pointing out some aspects of the cloud radiative effect with regard to the LW/SW regimes that are helpful to improve the core messages of the manuscript. To be completed...*

### Major Comments:

*To be added.*

1. Figure 9: The results in Fig. 9 (especially 9a) appear to contradict the results in Fig. 17 of Hong and Liu (2015, J. Climate), where Fnet at the surface is comparable with TOA Fnet for the same  $\tau_{\text{vis}}$  used here. Please attempt to explain this discrepancy.
2. Lines 352-354: There are evidently some errors in this sentence. The visible optical depths ( $\tau_{\text{vis}}$ ) for the Jan. and March case studies are 0.65 and 0.68, respectively (line 265) but here it says both  $\tau_{\text{vis}}$  are identical. Moreover,  $\tau_{\text{vis}} = 3 \text{ IWP}/(\rho_i D_e)$ , and multiplying the IWP profiles by a factor of 5 should also increase IWP by this factor, and thus increase  $\tau_{\text{vis}}$  by a factor of 5. That being so, the 5-fold  $\tau_{\text{vis}}$  stated for these two case studies should be 3.25 and 3.40 (not 2.94 and 2.85 as stated in the text).
3. Lines 379-380: Note this is due only to changes in SW radiation. Please provide an explanation to conceptually understand this. For example, is this due to the greater "effective" optical depth of the cirrus when incident reflected SW radiation enters cloud base at oblique angles?
4. Lines 382-384: But  $\tau_{\text{vis}}$  is almost the same for both case studies (0.65 vs. 0.68). Are you sure that a 0.03 change in  $\tau_{\text{vis}}$  can account for the shift in the snow albedo curves?

## Technical Comments:

1. Line 29: trough => through?  
*“Through” is probably bad expression. We change it to “from”.*
2. Figure 9: Fig. 8 => Fig. 8a,b?

*Another note by anonymous reviewer #4 was issued in a separate comment as follows:*

Lines 103-104: Regarding the use of the saturation mixing ratio to estimate the gas phase water content (GWC), consider citing Kramer et al. (2009, ACP, Fig. 7; 2020, ACP, Figs. 6, 7 & 9) to defend this assumption (i.e., RH<sub>i</sub> ~ 100% inside cirrus clouds). That may be a better option than referencing Heller's PhD thesis. However, measurements in Kramer et al. (2009; 2020) are not representative of Arctic cirrus where homogeneous ice nucleation appears more prevalent (suggesting higher RH<sub>i</sub>); see Mitchell et al. (2018, ACP).

*We overhauled this section according to the comments made by all reviewers. In doing so, we thank the reviewer for pointing out how to further motivate the “average” 100% RH<sub>i</sub>-assumption using the already mentioned publications by Krämer et al. (2009, 2020). Mitchell et al. (2018) convincingly state that homogeneous ice nucleation is more prevalent at high latitudes (and therefore the occurrence of high RH<sub>i</sub>). We include a short discussion involving updraft speeds and conclude that while higher ice supersaturation might be probable in the Arctic, also relaxation times of supersaturation are reduced. We also calculate the overall error for IWC in a worst case assumption.*

## References

- Afchine, A., Rolf, C., Costa, A., Spelten, N., Riese, M., Buchholz, B., et al. (2018). Ice particle sampling from aircraft – influence of the probing position on the ice water content. *Atmos. Meas. Tech.*, 11, 4015–4031.
- Birner, T. (2010). Residual Circulation and Tropopause Structure. *J. Atmos. Sci.*, 67, 2582–2600.
- Krämer, M., Schiller, C., Afchine, A., Bauer, R., Gensch, I., Mangold, A., et al. (2009). Ice supersaturations and cirrus cloud crystal numbers. *Atmos. Chem. Phys.*, 9, 3505–3522.
- Krämer, M., Rolf, C., Luebke, A., Afchine, A., Spelten, N., Costa, A., et al. (2016). A microphysics guide to cirrus clouds – Part 1: Cirrus types. *Atmos. Chem. Phys.*, 16, 3463–3483.
- Krämer, M., Rolf, C., Spelten, N., Afchine, A., Fahey, D., Jensen, E., et al. (2020). A microphysics guide to cirrus – Part 2: Climatologies of clouds and humidity from observations. *Atmos. Chem. Phys.*, 20, 12569–12608.
- Manney, G. L., & Lawrence, Z. D. (2016). The major stratospheric final warming in 2016: dispersal of vortex air and termination of Arctic chemical ozone loss. *Atmos. Chem. Phys.*, 16, 15371–15396.
- Mitchell, D. L., Garnier, A., Pelon, J., & Erfani, E. (2018). CALIPSO (IIR–CALIOP) retrievals of cirrus cloud ice-particle concentrations. *Atmos. Chem. Phys.*, 18, 17325–17354.
